# Supplementary material
Source: PubMed Central journal article supplement (PMC7711336)

**Supplemental Figure 1** Image of photoimmunotherapy (PIT) in a mouse after resection of orthotopic pancreatic cancer.

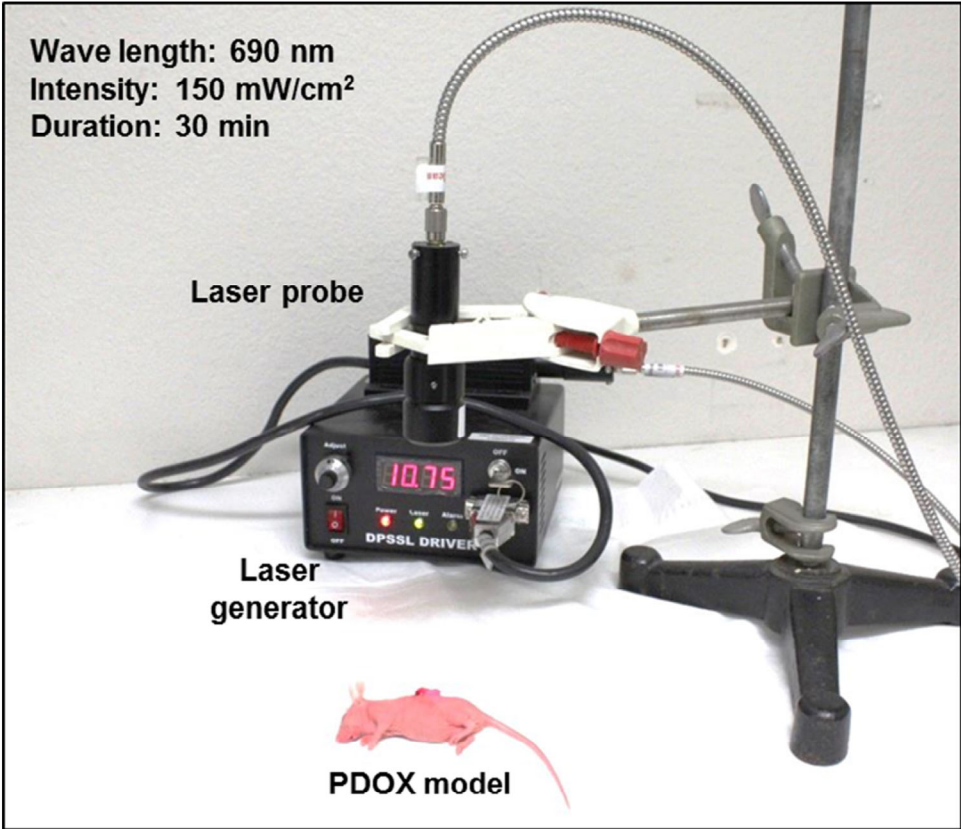

Supplement: NIHMS1647003-supplement-Supplemental_figure_1.pdf [file NIHMS1647003-supplement-Supplemental_figure_1.pdf]
